# Supplementary figures and images for: Thermodynamics predicts a stable microdroplet phase in polymer–gel mixtures undergoing elastic phase separation
Source: Royal Society of Chemistry journal article supplement (doi:10.1039/d2sm01101h), 2022-01-01

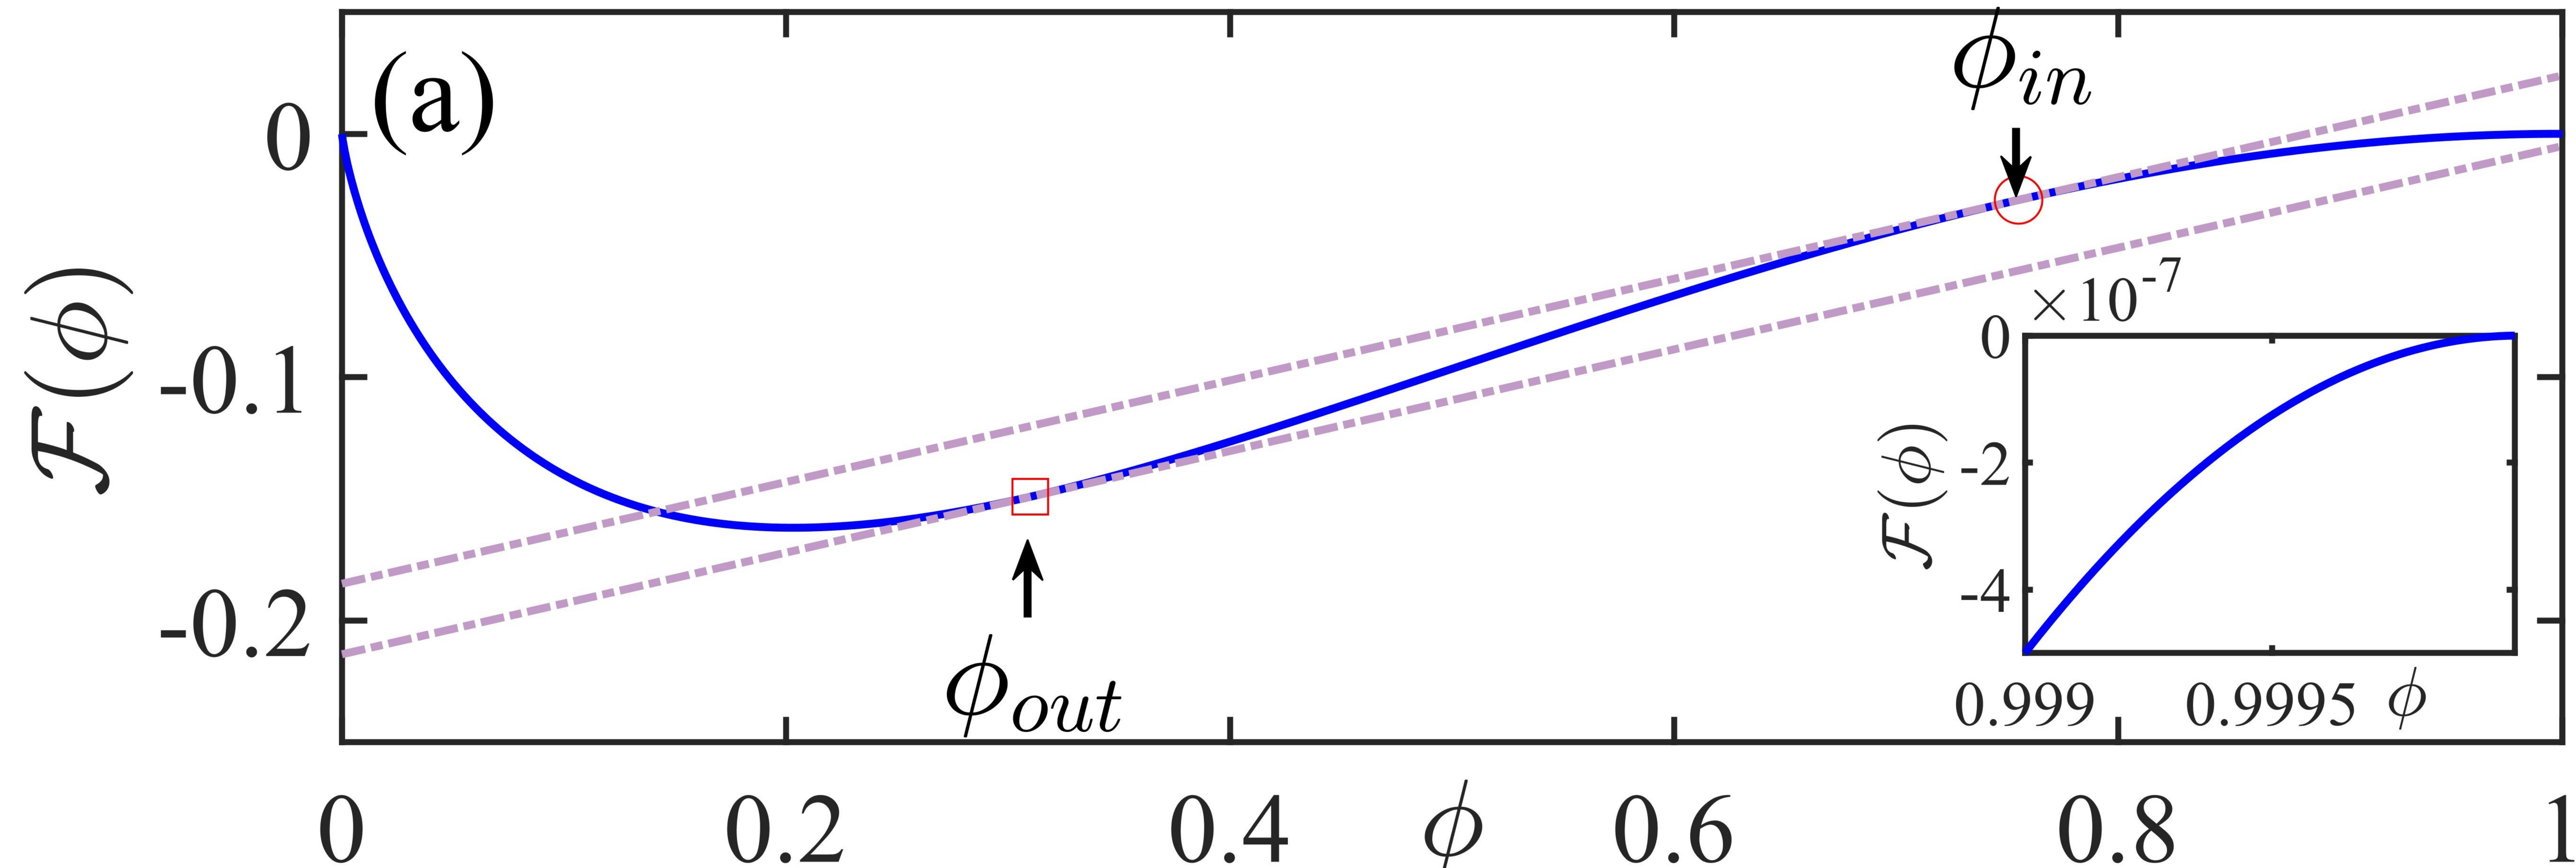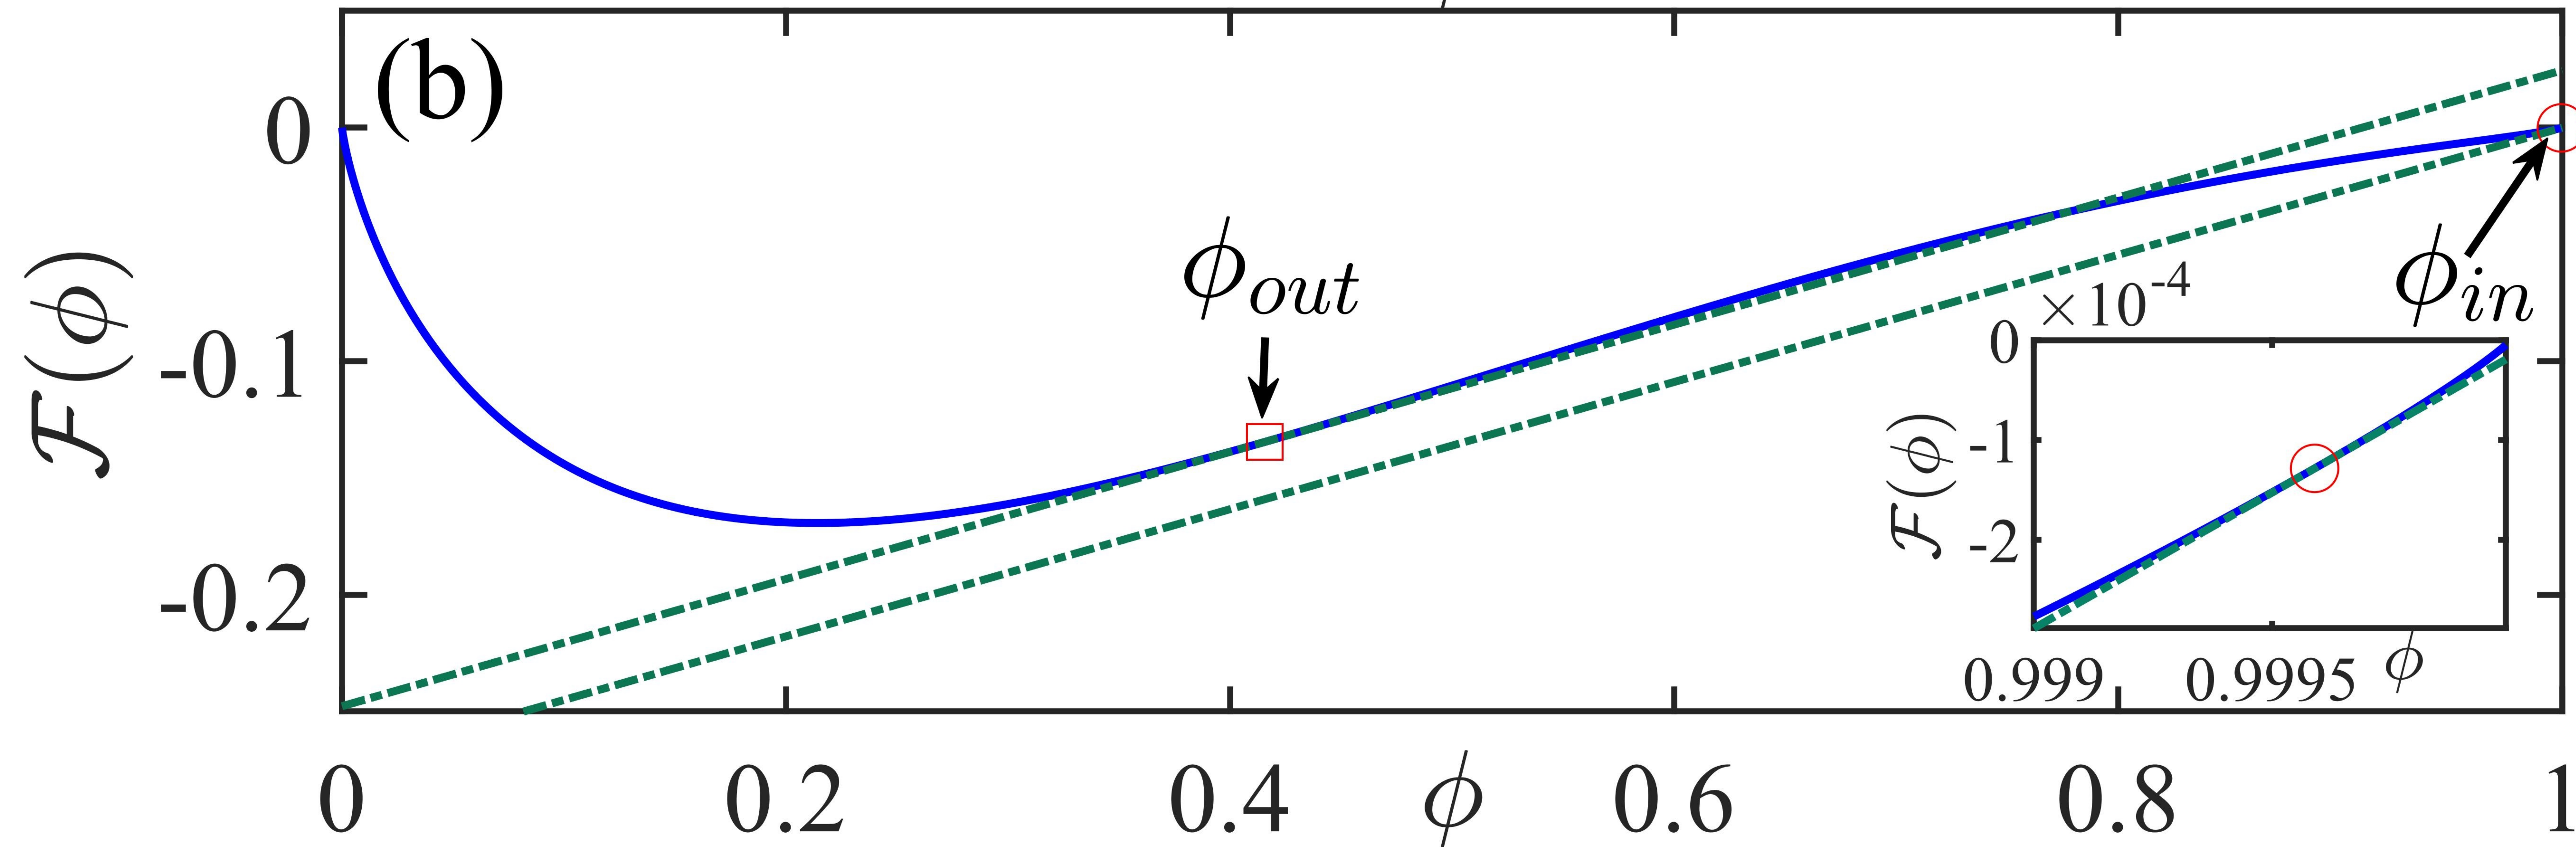

Supplement: d2sm01101h2.pdf [file d2sm01101h2.pdf]
